RESEARCH ARTICLE

# Cloning and expression analysis of *BmYki* gene in silkworm, *Bombyx mori*

Wenhui Zeng<sup>1</sup>✉, Riyuan Wang<sup>1</sup>✉, Tianyang Zhang<sup>1</sup>, Chunying Gong<sup>1</sup>, Weidong Zuo<sup>2</sup>, Rongpeng Liu<sup>2</sup>, Yao Ou<sup>2</sup>, Hanfu Xu<sup>1,2,3\*</sup>

**1** State Key Laboratory of Silkworm Genome Biology, Southwest University, Chongqing, China, **2** College of Biotechnology, Southwest University, Chongqing, China, **3** Institute of Sericulture and Systems Biology, Southwest University, Chongqing, China

✉ These authors contributed equally to this work.

\* [xuhf@swu.edu.cn](mailto:xuhf@swu.edu.cn)

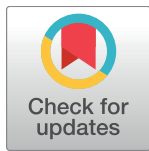

**OPEN ACCESS**

**Citation:** Zeng W, Wang R, Zhang T, Gong C, Zuo W, Liu R, et al. (2017) Cloning and expression analysis of *BmYki* gene in silkworm, *Bombyx mori*. PLoS ONE 12(8): e0182690. <https://doi.org/10.1371/journal.pone.0182690>

**Editor:** Amit Singh, University of Dayton, UNITED STATES

**Received:** April 27, 2017

**Accepted:** July 21, 2017

**Published:** August 9, 2017

**Copyright:** © 2017 Zeng et al. This is an open access article distributed under the terms of the [Creative Commons Attribution License](https://creativecommons.org/licenses/by/4.0/), which permits unrestricted use, distribution, and reproduction in any medium, provided the original author and source are credited.

**Data Availability Statement:** All relevant data are within the paper and its Supporting Information files.

**Funding:** This work was supported by the Chongqing Research Program of Basic Research and Frontier Technology Award Number: cstc2017jcyjBX0041 to Hanfu Xu and the Science & Technology Innovation Fund of Southwest University Award Number: 20163107001 to Hanfu Xu. The funders had no role in study design, data collection and analysis, decision to publish, or preparation of the manuscript.

## Abstract

The transcriptional coactivator Yorkie(Yki), is a critical downstream effector of the Hippo (Hpo) signaling pathway that controls organ size through the regulation of cell proliferation and apoptosis. During the past ten years the biological function of Yki has been studied extensively in *Drosophila* and a few other insects, however, little is known about it in the silkworm, *Bombyx mori*, a major research model of lepidopteran insect. Here, we describe the isolation, characterization and expression of the *B. mori* Yki ortholog, BmYki. The coding sequence of the *BmYki* was 1314 bp in length, encoding a protein of 437 amino acids containing two conserved WW domains. *BmYki* transcripts were ubiquitous but not abundant in all detected tissues and developmental stages. Comparatively, it was expressed at pretty high level in silk glands and at the stage of fifth-instar day-3 larvae. Overexpression of *BmYki* in cultured *B. mori* embryonic cells significantly promoted transcription of genes associated with cell proliferation and apoptosis, indicating that *BmYki* functions in the regulation of organ growth-related biological processes. Interestingly, transcription of silk protein-coding genes and transcription factors regulating the synthesis of silk proteins was downregulated remarkably, suggesting that *BmYki* was involved in the regulation of silk protein synthesis. This study provides new insights into the role of *BmYki* in Hpo pathway regulation in silkworm.

## Introduction

Precise control of organ size is a key feature of metazoans and a crucial process during animal development and regeneration[1]. How the animal organs grow to be the right size is one of the central mysteries of biology. Developmental genetics over the past decade have revealed the size of functional organs is a consequence of regulation of cell number and/or cell size, which are generally achieved by coordinately regulating cell growth, proliferation, and apoptosis[1–2]. Several signaling pathways have been implicated in such regulation, including the Wnt, Hedgehog, Transforming growth factor  $\beta$ (TGF $\beta$ ), Notch, Wingless, Myc, Target of rapamycin(TOR), Jun N-terminal kinase(JNK), and Hippo(Hpo) pathway[3–10]. Studies on these pathways will provide important entry points for clarifying mechanisms of organ size control.

**Competing interests:** The authors have declared that no competing interests exist.

The Hpo pathway firstly discovered in *Drosophila* and subsequently found in mammals and a few other insects[11–16], is now appreciated as a key regulator of organ growth in flies and mammals. It also plays crucial roles in other biological processes, such as tissue homeostasis and regeneration, cell fate determination, stem cell proliferation, and innate immunity[1,17–18]. It has been defined that core to the Hpo pathway is a kinase cascade composed of tumor suppressors Hpo, Salvador(Sav), Mob-as-tumor-suppressor(Mats), and Warts(Wts)[11–12,19–22], which ultimately phosphorylates and inactivates the transcriptional coactivator Yorkie(Yki), the most critical downstream effector of the Hpo pathway[23–24]. In *Drosophila*, loss of Hpo signaling activated Yki and led to accumulation of it in the nucleus and therefore induced expression of target genes that positively regulate cell growth, survival, and proliferation[25–26]. Overexpression of Yki resulted in organ overgrowth characterized by excessive cell proliferation and diminished apoptosis, and rescued the phenotype of Hpo signaling activation[23,27]. In *Helicoverpa armigera*, knockdown of Yki in the epidermal cell line(HaEpi) induced increased activation of cell apoptosis-related genes, whereas overexpressed Yki in HaEpi cells promoted cell proliferation-related genes[28–29]. Taken together, these evidences hint that Yki is a pivotal "switch" to uncover the role of Hpo pathway in organ size control.

We have previously identified the Yki ortholog(designated as *BmYki*) from the lepidopteran model insect, the silkworm *Bombyx mori*, yet whether it functions in regulating organ size has not been fully defined. In this study, we isolated the *BmYki* gene from three strains of *B. mori*, and further investigated the expression of *BmYki* and its function in the regulation of its downstream targets related to organ growth. Finally, we provided evidences that *BmYki* is involved in the synthesis of silk proteins in *B. mori*.

## Materials and methods

### Animals and cell lines

Three *B. mori* strains, *Dazao*(diapaused strain), *Nistari*(non-diapaused strain) and *LH*(non-diapaused strain), were obtained from Silkworm Gene Bank of Southwest University and reared with fresh mulberry leaves in the laboratory at 25–27°C. The cultured *B. mori* embryo cells(BmE) and ovary-derived cells(BmN) were stored in our laboratory and grown in Grace's insect medium containing 10% fetal bovine serum at 27°C.

### Gene cloning and sequence analysis

The nucleotide sequence of *BmYki*(BGIBMGA003638) previously identified from the database of SilkDB(<http://www.silkdb.org/silkdb/>), was used to design the specific primers(Table 1) and perform real-time polymerase chain reaction(RT-PCR) using the cDNA template of three *B. mori* strains, respectively. The PCR products were subcloned into the pEASY-T5 vector(TransGen) and verified by DNA sequencing. Alignment of the sequences was carried out using software ClustalX [30]. Searches of CDS domain and exon/intron were carried out through the use of GENSCAN (<http://genes.mit.edu/GENSCAN.html>) and SMART(<http://smart.embl-heidelberg.de/>). The *BmYki* gene isolated from *Dazao* strain was used for subsequent experiments.

### Construction of expression vectors

*pSL[BmA4-BmYki/EGFP-Ser1pA]*(abbreviated as *BmYki-EGFP*). The coding sequence of the *BmYki* with the stop codon deleted was PCR-amplified using specific primers(Table 1), digested with *Bam*HI and *Not* I, and inserted into the *pSL[BmA4-BN/EGFP-Ser1pA]* vector, to generate the vector *pSL[BmA4-BmYki/EGFP-Ser1pA]*. Expression of the *BmYki-EGFP* fusion protein was controlled by the promoter of *B. mori actin4* gene(*BmA4*).

**Table 1. Primer sequences.**

|             | Genes           | Forward primer(5'-3')       | Reverse primer(5'-3')          |
|-------------|-----------------|-----------------------------|--------------------------------|
| <b>A</b>    | <i>BmYki</i>    | ggatccATGGCTCTCAACTCGGACGGT | gcccgcTTACAGCCACGTGAGTACGTTGTC |
| <b>B</b>    | <i>BmYki</i>    | ggatccATGGCTCTCAACTCGGACGGT | gcccgcCAGCCACGTGAGTACGTTGTC    |
| <b>C</b>    | <i>BmYki</i>    | CGAAGAGTACAAGTAATACGACAA    | TACGAGCTGCGTGATTAATG           |
| <b>D</b>    | <i>Myc</i>      | CTGTATGTGGGCAGGTTCCG        | GTGGTTCATCGCCGTCTAA            |
|             | <i>Ras1</i>     | TGCGGGAGGCGTTGGTAA          | CAGCCGTGTCCAGGATGTCG           |
|             | <i>E2F1</i>     | TACAGCAGACCGTCCAGTT         | CCGCCGTATGTTCAAAT              |
|             | <i>CyclinE</i>  | GTCCACCCACACTCTAATAAA       | TCAGCCCAAGACAATCCAG            |
|             | <i>Diap1</i>    | GATTGGGAAAGCGATGACG         | GCCTCCGACTTCACCTTCTG           |
|             | <i>Diap2</i>    | GAGTGCCGAAACGACAATA         | AGTGCCTCTGAAGTCTGGAA           |
|             | <i>Caspase1</i> | AGGTGATAAGTTAGATGGTGG       | TGTGTTTCTCCAAGAGTAATAA         |
|             | <i>Caspase9</i> | TGCGTGTTCCTGGTGGTGTC        | TCGGGAGTCCGTGAAGTTG            |
|             | <i>Kibra</i>    | CGACCTATCCGAAGACGACTG       | GCACGGTTCCTTACATTCCAC          |
|             | <i>Expanded</i> | AGTTCGATTGCGTTGATG          | ATCTGTTGGGTCACTCCG             |
|             | <b>E</b>        | <i>fibH</i>                 | CAGGGGATACGGACAAGGT            |
| <i>fibL</i> |                 | GGAGGTGGAAGAATCTATGAC       | TGTAGGCAGCGATGTTGT             |
| <i>P25</i>  |                 | GGGTCTGCCATCTTCCAC          | CTCGCCAGCCAGTTCCTCT            |
| <i>Ser1</i> |                 | GGTCCAGAAGGCGTGTCTG         | ATTGTCCCGCAGAAGCAGAT           |
| <i>Ser2</i> |                 | CCAGGAGGATAACGACAGC         | TGGAGAAGTGTGCGTGGGT            |
| <i>Ser3</i> |                 | TACAGGTATGGCTGCGGA          | TCATCGGAGTCCTCGTCAT            |
| <i>Sage</i> |                 | ATTACGAGCCCAAGAGGAT         | CCACTACGGTGTACGAAC             |
| <i>Dimm</i> |                 | CACCGAATCTCCTGACCAA         | CATCACTCCGCTACCACTAT           |
| <i>SGF1</i> |                 | GCAGCACCCGTTTACGATC         | GCGGCGACTGGTAGTATATCC          |
| <i>SGF2</i> |                 | CCTGATACCTCGCTACTTCCG       | CGTGATGCTGGTGTGTTGG            |
| <i>SGF3</i> |                 | GAAACCGTCCGCTCAAGAAA        | GTTCGGTGGCGTCATCCCT            |
| <b>F</b>    | <i>sw22934</i>  | TTCGTACTGGCTCTTCTCGT        | CAAAGTTGATAGCAATTCCCT          |

A: Primers for gene cloning; B: Primers for subcellular localization construct; C-F: Primers for qRT-PCR analysis. Lowercase letters indicate restriction enzyme sites.

<https://doi.org/10.1371/journal.pone.0182690.t001>

*pB[UAS-BmYki,3×P3EGFP]*(abbreviated as *UASBmYki*). The coding sequence of *BmYki* was digested with *BamH* I and *Not* I, and inserted into the pUC57S[10×UAS-B/N-Ser1pA] vector, then the fragment UAS-*BmYki*-Ser1pA was subcloned into the *Asc* I site of the pB[3×P3EGFPafm][31], to generate the vector pB[UAS-*BmYki*,3×P3EGFP].

*pB[BmA4-Gal4,3×P3DsRed]*(abbreviated as *A4G4*). The synthesized Gal4 sequence was digested with *BamH* I and *Not* I, and inserted into the pUC57S[BmA4-B/N-Ser1pA] vector, then the fragment BmA4-Gal4-Ser1pA was subcloned into the *Asc* I site of the pB[3×P3DsRed][31], to generate the vector pB[BmA4-Gal4,3×P3DsRed].

### Subcellular localization analysis

A 100 μL mixture containing 3 μg of *BmYki*-EGFP plasmid DNA was mixed with 100 μL Grace's insect medium(without antibiotics) and incubated for 20 min at room temperature, then mixed with BmN cells. After 72 h culture at 27°C, cells were harvested, washed three times with 1×PBS, fixed with 4% paraformaldehyde for 10 min, dyed with 0.1% DAPI for 20 min at room temperature, and then washed three times with 1×PBS. The fixed cells were mounted in slides and observed using an FV1000 confocal microscope(Olympus, Japan). Images were processed using Photoshop 5.0.

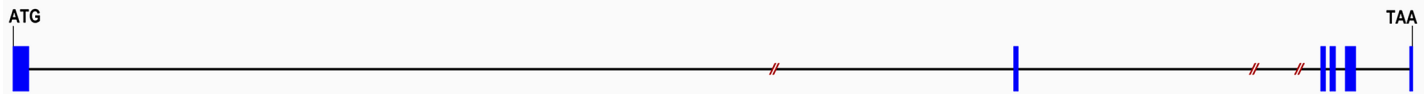

**Fig 1. Schematic representation of the gene structure of *BmYki*.** The exons (blue boxes) and introns (black lines) are shown. Double slashes indicate gaps in genomic sequences. The length of exon 1 ~ exon 6 is 473, 143, 141, 158, 303, and 96 bp, respectively.

<https://doi.org/10.1371/journal.pone.0182690.g001>

## Quantitative RT-PCR(qRT-PCR) analysis

To analyze expression patterns of *BmYki*, total RNA from different tissues and developmental stages of *Dazao* strain were isolated and used to prepare cDNA templates using cDNA synthesis Kit Manual (Takara). qRT-PCR was carried out in 20  $\mu$ L solution, which contains 5 ng of cDNA templates, 10  $\mu$ L of 1 $\times$ SYBR<sup>®</sup> Green I taq (Takara) and 0.5 mM of each primer. The 7500FAST Real-Time PCR System (ABI, USA) was employed. The eukaryotic translation initiation factor 4A (silkworm microarray probe ID: sw22934) was used as an internal control [32].

To determine the mRNA level of target genes in BmE cells overexpressing *BmYki*, the cells transfected with 3  $\mu$ g mixture of UAS*BmYki* (400 ng/ $\mu$ L) and A4G4 plasmid DNA (400 ng/ $\mu$ L) were harvested after 72 h culture at 27°C and used to prepare cDNA templates. mRNA levels of each target gene were measured by qRT-PCR as described above. All primers used in qRT-PCR were summarized in Table 1.

## Results and discussion

### Isolation and sequence analysis of *BmYki*

To isolate the coding sequence of *BmYki*, the ~1300 bp fragment containing the putative *BmYki* gene was obtained by RT-PCR from three *B. mori* strains, respectively. Further sequence analysis showed that the coding sequence of each *BmYki* is 1314 bp in length, composed of six exons and five introns, and encodes a protein of 437 amino acids containing two conserved WW domains (Figs 1 and 2) that is capable of interacting with PPXY motifs found in Wts [21]. The amino acid sequence identity of the three *BmYki* genes was as high as 98.4%. It is worth noting that a ~1100 bp fragment was also amplified from each of the *B. mori* strain (S1 Fig), and nucleotide sequences of the fragment were almost identical to that of the *BmYki* gene, except for the lack of the third exon. We thus speculate that *BmYki* exists in multiple alternative splicing forms in *B. mori*, which is an interesting discovery that deserves further being investigated.

### Localization of *BmYki*-EGFP fusion proteins in BmN cells

It has been reported that Yki is mainly located in cytoplasm of *Drosophila* S2 cells [25]. To determine the subcellular localization of *BmYki*, the plasmid expressing *BmYki*-EGFP fusion proteins was transfected into BmN cells. The result showed that the *BmYki*-EGFP fusion protein was mainly cytoplasmic (Fig 3), which is similar to that observed in *Drosophila* S2 cells. The weak GFP fluorescence observed in the nucleus of BmN cells is thought to be the result of products working in the nucleus.

### Expression patterns of *BmYki* during development

To investigate the expression profile of *BmYki*, mRNA levels of *BmYki* gene in different tissues and various developmental stages of *B. mori* were determined by qRT-PCR. The results showed that *BmYki* transcripts were ubiquitous but less abundant in *B. mori* (Fig 4). Comparatively, *BmYki* was expressed higher in head, trachea, testis, ovary, and was particularly high in

|               |                                            |                          |                                |               |     |
|---------------|--------------------------------------------|--------------------------|--------------------------------|---------------|-----|
| Nistari_BmYki | MALNSDGEQKSNLVL RVDQ                       | DSDSV LQSLFDTVLKPD       | SKRPLQVPL RMRQLPKSFFNPPST      | 60            |     |
| Dazao_BmYki   | MALNSDGEQKSNLVL RVD                        | RDSDSV LQSLFDTVLKPD      | SKRPLQVPL RMRQLPKSFFNPPST      | 60            |     |
| LH_BmYki      | MALNSDGEQKSNLVL RVDQ                       | QDSDSV LQSLFDTVLKPD      | SKRPLQVPL RMRQLPKSFFNPPST      | 60            |     |
|               |                                            |                          |                                |               |     |
| Nistari_BmYki | GSKSPSVSHSRENSADSAFGSSSA                   | TGTS TVSHSRAHSSPASLQQTY  | TAGQQSQQPPLHHQ                 | 120           |     |
| Dazao_BmYki   | GSKSPSVSHSRENSADSAFGSSSA                   | TGTS TVSHSRAHSSPASLQQTY  | TAGQQSQQPPLHHQ                 | 120           |     |
| LH_BmYki      | GSKSPSVSHSRENSADSAFGSSSA                   | TGTS TVSHSRAHSSPASLQQTY  | TAGQQSQQPPLHHQ                 | 120           |     |
|               |                                            |                          |                                |               |     |
| Nistari_BmYki | HTKQRSYDVGTHIPDDLGLPLPAGWEQARTPEGGQIYYLNHI | TKTTTWDDPRKTLAAQNVAN     | 180                            |               |     |
| Dazao_BmYki   | HTKQRSYDVGTHIPDDLGLPLPAGWEQARTPEGGQIYYLNHI | TKTTTWDDPRKTLAAQNVAN     | 180                            |               |     |
| LH_BmYki      | HTKQRSYDVGTHIPDDLGLPLPAGWEQARTPEGGQIYYLNHI | TKTTTWDDPRKTLAAQNVAN     | 180                            |               |     |
|               |                                            |                          |                                |               |     |
| Nistari_BmYki | TVQHQA AEALLNQNAQQ                         | TI TNTA TPAAKSTSN        | TTTTDPLGLPLEGWEQATTAEGE IYFINH | 240           |     |
| Dazao_BmYki   | TVQHQA AEALLNQNAQR                         | TI TNTA TPAAKSTSN        | TTTTDPLGLPLEGWEQATTAEGE IYFINH | 240           |     |
| LH_BmYki      | TVQHQA AEALLNQNAQQ                         | TI TNTA TPAAKSTSN        | TTTTDPLGLPLEGWEQATTAEGE IYFINH | 240           |     |
|               |                                            |                          |                                |               |     |
| Nistari_BmYki | AARTTSWFDPRIPQHLQRT                        | PVGAAGVAGGGWANASIQACQKLR | LQSLQLERDR LKQRQQ              | 300           |     |
| Dazao_BmYki   | AARTTSWFDPRIPQHLQRT                        | PVGAAGVAGGGWANASIQACQKLR | LQSLQLERDC LKQRQQ              | 300           |     |
| LH_BmYki      | AARTTSWFDPRIPQHLQRT                        | PVGAAGVAGGGWANASIQACQKLR | LQSLQLERDR LKQRQQ              | 300           |     |
|               |                                            |                          |                                |               |     |
| Nistari_BmYki | EIRLQQELMARQASSIVSSLASSTGAVASTE            | LPLDPFLPGLTDHQRQESAD     | SGLGMAVPQ                      | 360           |     |
| Dazao_BmYki   | EIRLQQELMARQASSIVSSLASSTGAVASTE            | LPLDPFLPGLTDHQRQESAD     | SGLGMAVPQ                      | 360           |     |
| LH_BmYki      | EIRLQQELMARQASSIVSSLASSTGAVASTE            | LPLDPFLPGLTDHQRQESAD     | SGLGMAVPQ                      | 360           |     |
|               |                                            |                          |                                |               |     |
| Nistari_BmYki | YSMPHTPEDFLSGMD                            | DRMDCTSEAGANMDS          | TDITLGDNIGSTDDL                | LNFTNDILLDDVQ | 420 |
| Dazao_BmYki   | YSMPLTPEDFLSGMG                            | DRMDCTSEAGANMDS          | TDITLGDNIGSTDDL                | LNFTNDILLDDVQ | 420 |
| LH_BmYki      | YSMPHTPEDFLSGMD                            | DRMDCTSEAGANMDS          | TDITLGDNIGSTDDL                | LNFTNDILLDDVQ | 420 |
|               |                                            |                          |                                |               |     |
| Nistari_BmYki | SLINSTPSKSDNVLTWL                          |                          |                                | 437           |     |
| Dazao_BmYki   | SLINSTPSKSDNVLTWL                          |                          |                                | 437           |     |
| LH_BmYki      | SLINSTPSKPDNVLTWL                          |                          |                                | 437           |     |

**Fig 2. Alignment amino acid sequences of BmYki of three *B. mori* strains.** Identical amino acid residues among *Dazao*, *Nistari* and *LH* strains are shaded in black. The WW domains are underlined in red.

<https://doi.org/10.1371/journal.pone.0182690.g002>

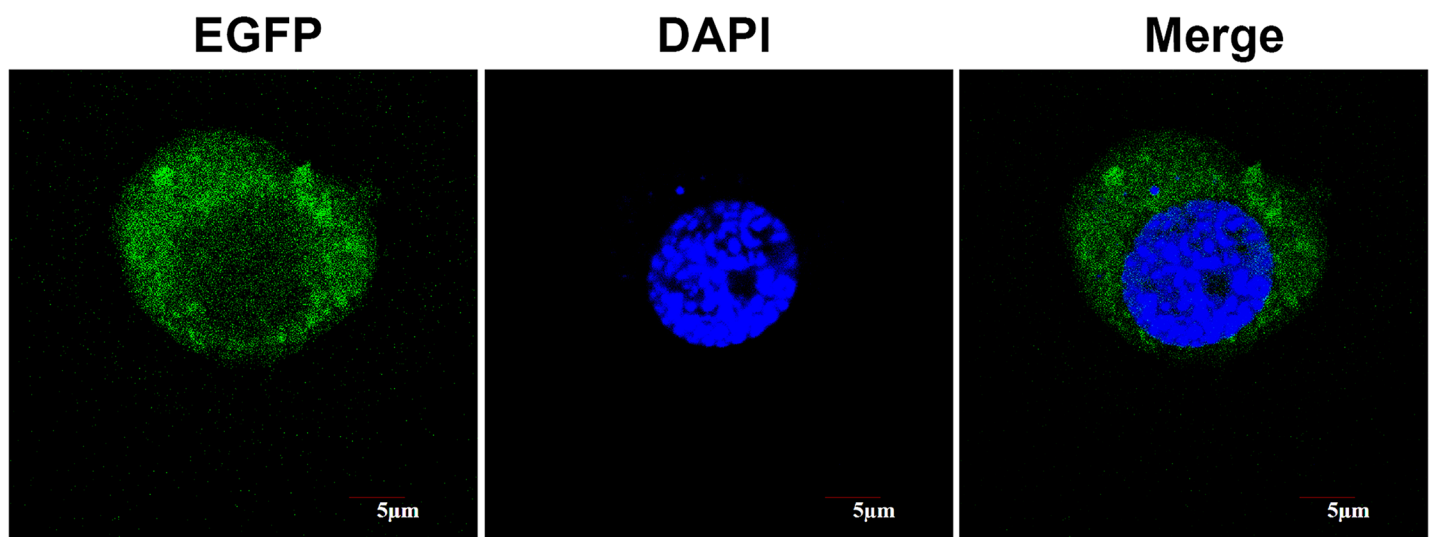

**Fig 3. Localization of BmYki-EGFP fusion proteins in BmN cells.** The coding sequence of the BmYki with the stop codon deleted was fused to EGFP and transiently transfected into the BmN cells. Subcellular localization of the expressed BmYki-EGFP fusion proteins was observed by fluorescence microscopy.

<https://doi.org/10.1371/journal.pone.0182690.g003>

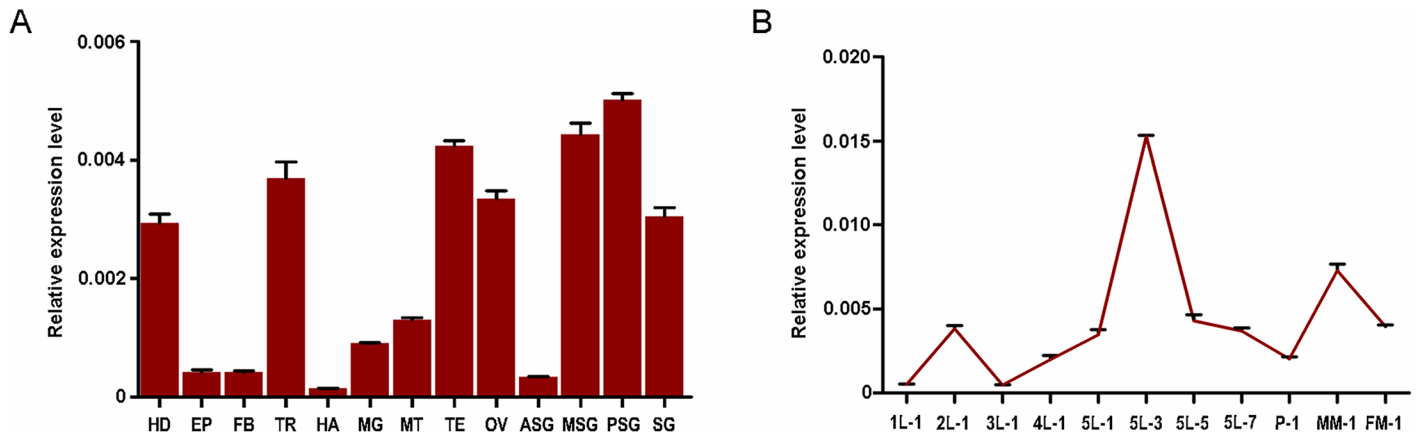

**Fig 4. Expression profiles of *BmYki* in *B. mori*.** (A)mRNA levels of *BmYki* in different tissues of *Dazao* strain. HD(head); EP(epidermis); FB (fat body); TR (trachea); HA(hemocyte); MG(midgut); MT(malpighian tubule); TE(testis); OV(ovary); ASG(anterior silk gland); MSG(middle silk gland); PSG (posterior silk gland); SG (total silk gland). (B)mRNA levels of *BmYki* at different developmental stages of *Dazao* strain. 1L-1, 2L-1, 3L-1, and 4L-1(day-1 of the first, second, third, and fourth larval instar); 5L-1, 5L-3, 5L-5, and 5L-7(day-1, 3, 5, and 7 of the fifth instar), P-1(day-1 of the pupal stage), MM-1 and FM-1(day-1 of the male and female moth). Relative mRNA levels of *BmYki* against *sw22934* are shown. Error bars represent mean  $\pm$ SD of three samples.

<https://doi.org/10.1371/journal.pone.0182690.g004>

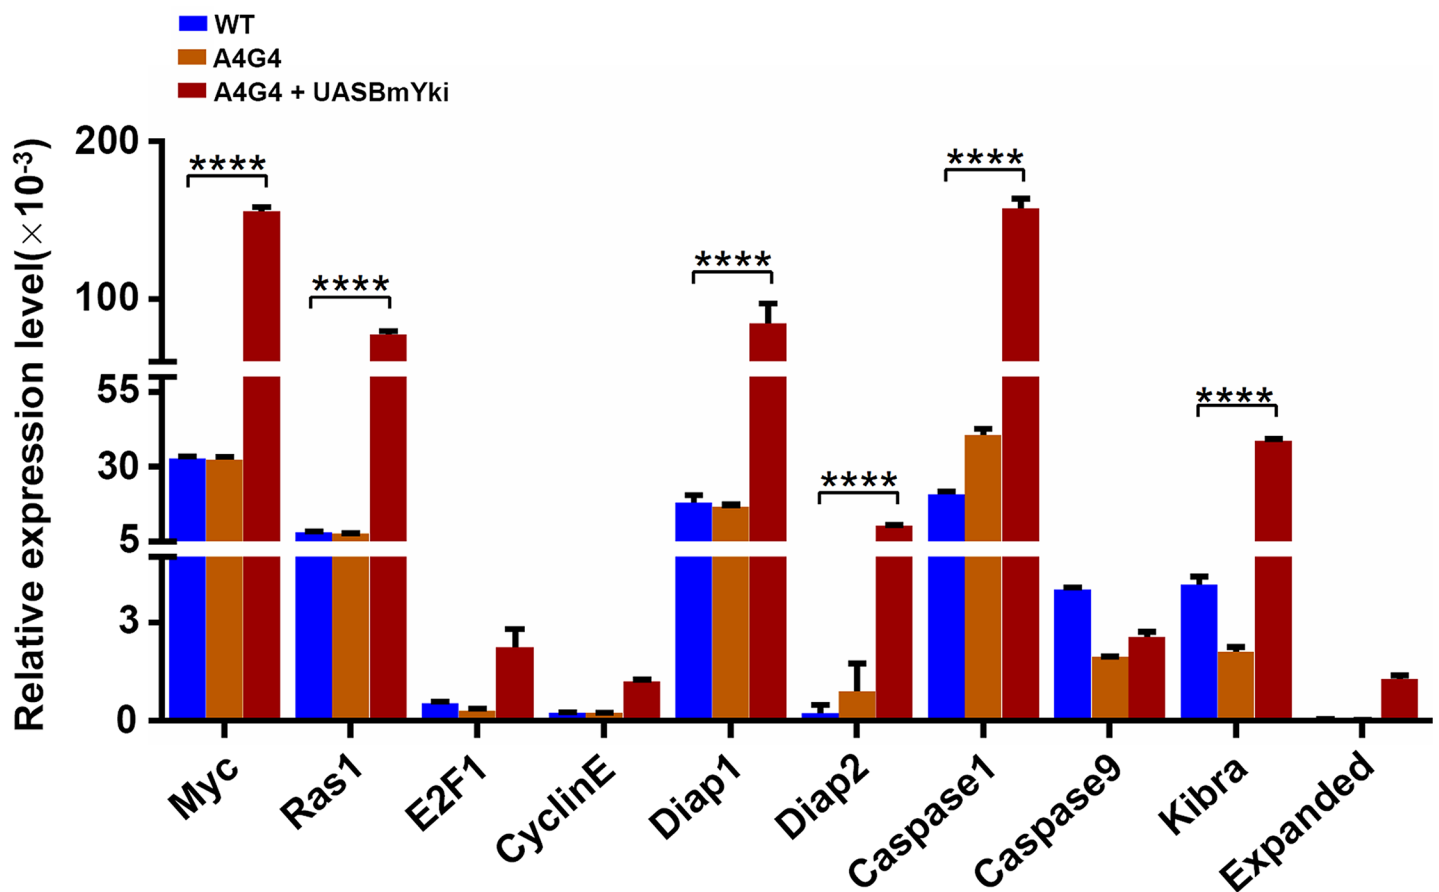

**Fig 5. mRNA levels of *Yki* target genes in BmE cells overexpressing *BmYki*.** Expression of *B. mori* genes homologous to known targets of *Drosophila* *Yki*. Relative mRNA levels are indicated as the ratios of mRNA levels between the target gene and *sw22934*. Error bars represent mean  $\pm$ SD of three samples.

<https://doi.org/10.1371/journal.pone.0182690.g005>



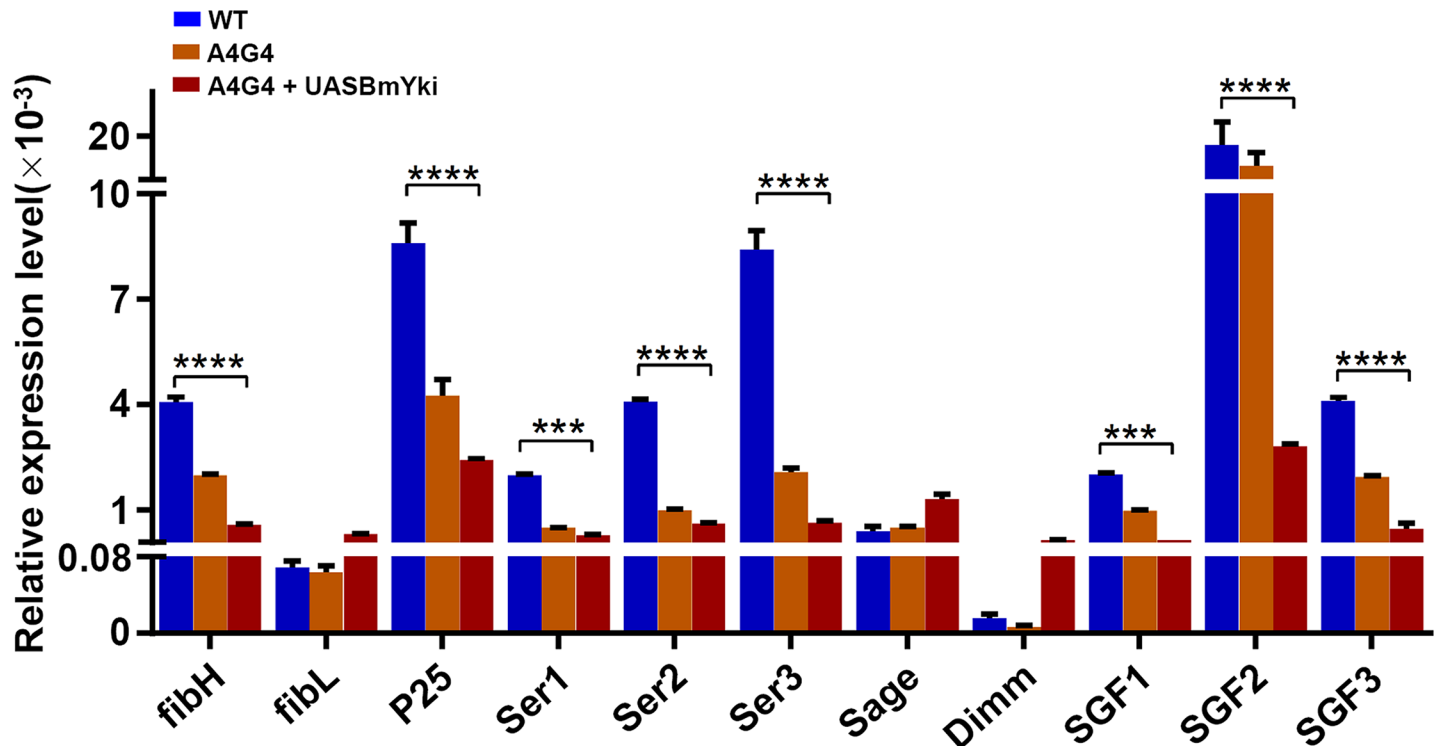

**Fig 6. mRNA levels of silk protein synthesis-related genes in BmE cells overexpressing *BmYki*.** Expression of silk protein synthesis-related genes in BmE cells were quantified by qRT-PCR. Relative mRNA levels are indicated as the ratios of mRNA levels between the target gene and *sw22934*. Error bars represent mean  $\pm$ SD of three samples.

<https://doi.org/10.1371/journal.pone.0182690.g006>

both the middle and posterior silk glands, and at the fifth-instar day-3 larvae—a developmental stage considered to be the beginning of mass synthesis of silk proteins, which strongly suggesting the involvement of *BmYki* in the regulation of silk protein synthesis. Further study is required to elucidate the meaning of *BmYki* in silk glands.

### Functional analysis of *BmYki* in BmE cells

To investigate whether the *BmYki* is involved in the regulation of organ growth-related biological processes, mRNA levels of *B. mori* genes homologous to known targets of *Drosophila* *Yki*, including cell growth-promoting genes *Myc* and *Ras1*, cell cycle progression genes *E2F1* and *cyclinE*, cell apoptosis-related genes *Diap1*, *Diap2*, *Caspase1* and *Caspase9*, and Hpo pathway components *Expanded* and *Kibra*, were determined by qRT-PCR. As shown in Fig 5 and S2 Fig, nine of these ten genes were upregulated in BmE cells overexpressing *BmYki*, among which six targets *Myc*, *Ras1*, *Diap1*, *Diap2*, *Caspase1* and *Kibra* were remarkably upregulated, indicating that *BmYki* has the function of regulating downstream target genes associated with cell growth, proliferation, and apoptosis.

To further explore whether the *BmYki* is involved in silk protein synthesis, we examined the expression of genes responsible for synthesis of silk proteins, including fibroin protein-coding genes *FibH*, *FibL* and *P25*, sericin protein-coding genes *Ser1*, *Ser2* and *Ser3*, and silk gland factors *Sage*, *Dimm*, *SGF1*, *SGF2* and *SGF3*. The results showed that eight of eleven genes were significantly downregulated upon *BmYki* overexpression, while the other three genes were slightly upregulated (Fig 6), indicating that *BmYki* functions in the regulation of silk protein synthesis. We are now preparing to generate transgenic silkworms overexpressing *BmYki*

specifically in the middle and posterior silk gland, to clarify the mechanism of *BmYki* in the regulation of silk protein synthesis.

## Conclusions

In conclusion, we isolated the coding sequence of *BmYki* with a length of 1314 bp from *B. mori*. Expression of the *BmYki* gene was comparatively high in both the middle and posterior silk gland, and at the fifth-instar day-3 larval stage. Furthermore, we showed that *BmYki*-EGFP fusion proteins were localized mainly in the cytoplasm of *BmN* cells. Finally, we demonstrated that overexpression of *BmYki* in *BmE* cells remarkably promoted the expression of genes homologous to known targets of *Drosophila* *Yki*, and significantly downregulated the expression of silk protein synthesis-related genes. This study provides new insights into the expression and function of *BmYki*. It would be very interesting to further elucidate the mechanism of *BmYki* in the regulation of silk protein synthesis.

## Supporting information

**S1 Fig. Agarose gel electrophoresis of the RT-PCR amplified *BmYki* gene products.** Lane M: DNA marker; Lanes 1~2: cDNA template of *Dazao* embryos; Lanes 3~4: cDNA template of *LH* embryos; Lanes 5~10: cDNA template of *Nistari* middle silk glands; Lanes 11~14: cDNA template of *Nistari* posterior silk glands. RT-PCR amplification was performed at least three replicates for each sample. The PCR products were detected on 1.2% agarose gel electrophoresis. Red arrows indicate the ~1300 and ~1100 bp fragments containing the putative *BmYki* gene. (TIF)

**S2 Fig. Detection of overexpression of *BmYki* in *BmE* cells.** *BmE* cells transfected with UAS*BmYki* and A4G4 plasmids were harvested to prepare cDNA templates. mRNA levels of *BmYki* were measured by qRT-PCR. Relative mRNA levels are indicated as the ratios of mRNA levels between the *BmYki* and *sw22934*. Error bars represent mean  $\pm$ SD of three samples. (TIF)

## Acknowledgments

We thank Prof. Hongjuan Cui and Dr. Hai Hu for providing cultured cells and *B. mori* strains, respectively.

## Author Contributions

**Conceptualization:** Hanfu Xu.

**Data curation:** Hanfu Xu.

**Formal analysis:** Wenhui Zeng, Riyuan Wang, Weidong Zuo, Hanfu Xu.

**Funding acquisition:** Hanfu Xu.

**Investigation:** Wenhui Zeng, Riyuan Wang, Tianyang Zhang, Yao Ou.

**Project administration:** Hanfu Xu.

**Resources:** Chunying Gong, Rongpeng Liu.

**Supervision:** Hanfu Xu.

**Validation:** Hanfu Xu.



**Visualization:** Wenhui Zeng, Riyuan Wang, Hanfu Xu.

**Writing – original draft:** Hanfu Xu.

**Writing – review & editing:** Hanfu Xu.

## References

1. Tumaneng K, Russell RC, Guan KL. Organ size control by Hippo and TOR pathways. *Curr Biol*. 2012; 22(9):R368–379. <https://doi.org/10.1016/j.cub.2012.03.003> PMID: 22575479
2. Pan D. Hippo signaling in organ size control. *Genes Dev*. 2007; 21(8):886–897. <https://doi.org/10.1101/gad.1536007> PMID: 17437995
3. Forsthoefel DJ, Newmark PA. Emerging patterns in planarian regeneration. *Curr Opin Genet Dev*. 2009; 19(4):412–420. <https://doi.org/10.1016/j.gde.2009.05.003> PMID: 19574035
4. Rink JC, Gurley KA, Elliott SA, Sánchez Alvarado A. Planarian Hh signaling regulates regeneration polarity and links Hh pathway evolution to cilia. *Science*. 2009; 326(5958):1406–1410. <https://doi.org/10.1126/science.1178712> PMID: 19933103
5. Yazawa S, Umesonon Y, Hayashi T, Tarui H, Agata K. Planarian Hedgehog/Patched establishes anterior-posterior polarity by regulating Wnt signaling. *Proc Natl Acad Sci U S A*. 2009; 106(52):22329–22334. <https://doi.org/10.1073/pnas.0907464106> PMID: 20018728
6. Micchelli CA, Blair SS. Dorsal-ventral lineage restriction in wing imaginal discs requires Notch. *Nature*. 1999; 401(6752):473–476. <https://doi.org/10.1038/46779> PMID: 10519549
7. Zhang H, Stallock JP, Ng JC, Reinhard C, Neufeld TP. Regulation of cellular growth by the Drosophila target of rapamycin dTOR. *Genes Dev*. 2000; 14(21):2712–2724. PMID: 11069888
8. Smith-Bolton RK, Worley MI, Kanda H, Hariharan IK. Regenerative growth in Drosophila imaginal discs is regulated by Wingless and Myc. *Dev Cell*. 2009; 16(6):797–809. <https://doi.org/10.1016/j.devcel.2009.04.015> PMID: 19531351
9. Bosch M, Serras F, Martín-Blanco E, Baguña J. JNK signaling pathway required for wound healing in regenerating Drosophila wing imaginal discs. *Dev Biol*. 2005; 280(1):73–86. <https://doi.org/10.1016/j.ydbio.2005.01.002> PMID: 15766749
10. Grusche FA, Degoutin JL, Richardson HE, Harvey KF. The Salvador/Warts/Hippo pathway controls regenerative tissue growth in Drosophila melanogaster. *Dev Biol*. 2011; 350(2):255–266. <https://doi.org/10.1016/j.ydbio.2010.11.020> PMID: 21111727
11. Justice RW, Zilian O, Woods DF, Noll M, Bryant PJ. The Drosophila tumor suppressor gene warts encodes a homolog of human myotonic dystrophy kinase and is required for the control of cell shape and proliferation. *Genes Dev*. 1995; 9(5):534–546. PMID: 7698644
12. Xu T, Wang W, Zhang S, Stewart RA, Yu W. Identifying tumor suppressors in genetic mosaics: the Drosophila *lats* gene encodes a putative protein kinase. *Development*. 1995; 121(4):1053–1063. PMID: 7743921
13. Yu FX, Guan KL. The Hippo pathway: regulators and regulations. *Genes Dev*. 2013; 27(4):355–371. <https://doi.org/10.1101/gad.210773.112> PMID: 23431053
14. Bando T, Mito T, Maeda Y, Nakamura T, Ito F, Watanabe T, Ohuchi H, Noji S. Regulation of leg size and shape by the Dachshous/Fat signalling pathway during regeneration. *Development*. 2009; 136(13):2235–2245. <https://doi.org/10.1242/dev.035204> PMID: 19474149
15. Gotoh H, Hust JA, Miura T, Niimi T, Emlen DJ, Lavine LC. The Fat/Hippo signaling pathway links within-disc morphogen patterning to whole-animal signals during phenotypically plastic growth in insects. *Dev Dyn*. 2015; 244(9):1039–1045. <https://doi.org/10.1002/dvdy.24296> PMID: 25997872
16. Elshaer N, Piulachs MD. Crosstalk of EGFR signalling with Notch and Hippo pathways to regulate cell specification, migration and proliferation in cockroach panoistic ovaries. *Biol Cell*. 2015; 107(8):273–285. <https://doi.org/10.1111/boc.201500003> PMID: 25907767
17. Hong AW, Meng Z, Guan KL. The Hippo pathway in intestinal regeneration and disease. *Nat Rev Gastroenterol Hepatol*. 2016; 13(6):324–337. <https://doi.org/10.1038/nrgastro.2016.59> PMID: 27147489
18. Liu B, Zheng Y, Yin F, Yu J, Silverman N, Pan D. Toll Receptor-Mediated Hippo Signaling Controls Innate Immunity in Drosophila. *Cell*. 2016; 164(3):406–419. <https://doi.org/10.1016/j.cell.2015.12.029> PMID: 26824654
19. Tapon N, Harvey KF, Bell DW, Wahrer DC, Schiripo TA, Haber D, Hariharan IK. Salvador promotes both cell cycle exit and apoptosis in Drosophila and is mutated in human cancer cell lines. *Cell*. 2002; 110(4):467–478. PMID: 12202036

20. Wu S, Huang J, Dong J, Pan D. Hippo encodes a Ste-20 family protein kinase that restricts cell proliferation and promotes apoptosis in conjunction with salvador and warts. *Cell*. 2003; 114(4):445–456. PMID: [12941273](https://pubmed.ncbi.nlm.nih.gov/12941273/)
21. Harvey KF, Pflieger CM, Hariharan IK. The *Drosophila* Mst ortholog, hippo, restricts growth and cell proliferation and promotes apoptosis. *Cell*. 2003; 114(4):457–467. PMID: [12941274](https://pubmed.ncbi.nlm.nih.gov/12941274/)
22. Lai ZC, Wei X, Shimizu T, Ramos E, Rohrbaugh M, Nikolaidis N, Ho LL, Li Y. Control of cell proliferation and apoptosis by mob as tumor suppressor, mats. *Cell*. 2005; 120(5):675–685. <https://doi.org/10.1016/j.cell.2004.12.036> PMID: [15766530](https://pubmed.ncbi.nlm.nih.gov/15766530/)
23. Staley BK, Irvine KD. Hippo signaling in *Drosophila*: recent advances and insights. *Dev Dyn*. 2012; 241(1):3–15. <https://doi.org/10.1002/dvdy.22723> PMID: [22174083](https://pubmed.ncbi.nlm.nih.gov/22174083/)
24. Huang J, Wu S, Barrera J, Matthews K, Pan D. The Hippo signaling pathway coordinately regulates cell proliferation and apoptosis by inactivating Yorkie, the *Drosophila* Homolog of YAP. *Cell*. 2005; 122(3):421–434. <https://doi.org/10.1016/j.cell.2005.06.007> PMID: [16096061](https://pubmed.ncbi.nlm.nih.gov/16096061/)
25. Goulev Y, Fauny JD, Gonzalez-Marti B, Flagiello D, Silber J, Zider A. SCALLOPED interacts with YORKIE, the nuclear effector of the hippo tumor-suppressor pathway in *Drosophila*. *Curr Biol*. 2008; 18(6):435–441. <https://doi.org/10.1016/j.cub.2008.02.034> PMID: [18313299](https://pubmed.ncbi.nlm.nih.gov/18313299/)
26. Oh H, Irvine KD. Cooperative regulation of growth by Yorkie and Mad through bantam. *Dev Cell*. 2011; 20(1):109–122. <https://doi.org/10.1016/j.devcel.2010.12.002> PMID: [21238929](https://pubmed.ncbi.nlm.nih.gov/21238929/)
27. Dong J, Feldmann G, Huang J, Wu S, Zhang N, Comerford SA, Gayyed MF, Anders RA, Maitra A, Pan D. Elucidation of a universal size-control mechanism in *Drosophila* and mammals. *Cell*. 2007; 130(6):1120–1133. <https://doi.org/10.1016/j.cell.2007.07.019> PMID: [17889654](https://pubmed.ncbi.nlm.nih.gov/17889654/)
28. Dong DJ, Jing YP, Liu W, Wang JX, Zhao XF. The Steroid Hormone 20-Hydroxyecdysone Up-regulates Ste-20 Family Serine/Threonine Kinase Hippo to Induce Programmed Cell Death. *J Biol Chem*. 2015; 290(41):24738–24746. <https://doi.org/10.1074/jbc.M115.643783> PMID: [26272745](https://pubmed.ncbi.nlm.nih.gov/26272745/)
29. Wang D, Li XR, Dong DJ, Huang H, Wang JX, Zhao XF. The steroid hormone 20-hydroxyecdysone promotes the cytoplasmic localization of Yorkie to suppress cell proliferation and induce apoptosis. *J Biol Chem*. 2016; 291(41):21761–21770. <https://doi.org/10.1074/jbc.M116.719856> PMID: [27551043](https://pubmed.ncbi.nlm.nih.gov/27551043/)
30. Thompson JD, Gibson TJ, Plewniak F, Jeanmougin F, Higgins DG. The ClustalX windows interface: Xexible strategies for multiple sequence alignment aided by quality analysis tools. *Nucleic Acids Res*. 1997; 25(24):4876–4882. PMID: [9396791](https://pubmed.ncbi.nlm.nih.gov/9396791/)
31. Horn C, Wimmer EA. A versatile vector set for animal transgenesis. *Dev Genes Evol*. 2000; 210(12):630–637. PMID: [11151300](https://pubmed.ncbi.nlm.nih.gov/11151300/)
32. Wang GH, Xia QY, Cheng DJ, Duan J, Zhao P, Chen J, Zhu L. Reference genes identified in the silkworm *Bombyx mori* during metamorphosis based on oligonucleotide microarray and confirmed by qRT-PCR. *Insect Sci*. 2008; 15(5):405–413. <https://doi.org/10.1111/j.1744-7917.2008.00227.x>
